# Supplementary figures and images for: One-step hydrothermal synthesis and optical properties of aluminium doped ZnO hexagonal nanoplates on a zinc substrate
Source: Royal Society of Chemistry journal article supplement (doi:10.1039/c0ce00704h), 2010-12-02

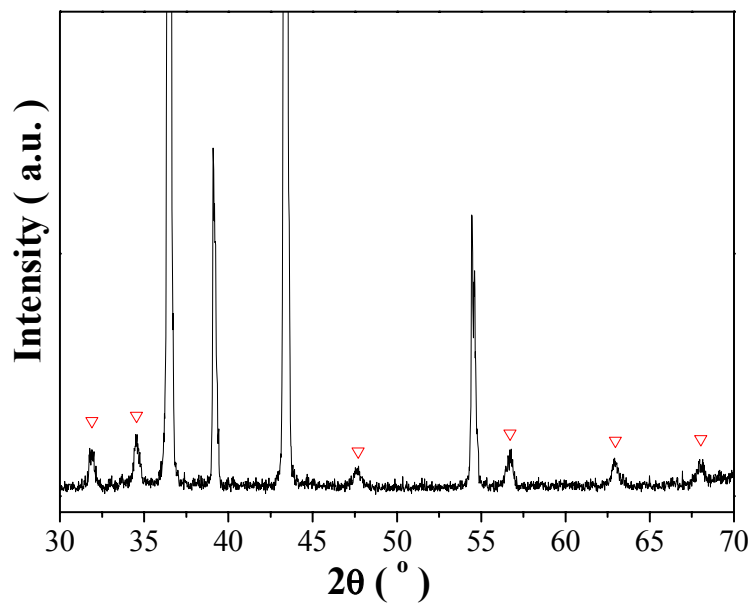

Fig. S1. The XRD patterns of the nominal 0.04 mmol Al<sup>3+</sup> doping ZnO.

Supplement: c0ce00704h.pdf [file c0ce00704h.pdf]
